# Supplementary material for: MicroRNA-203 contributes to skin re-epithelialization
Source: PubMed Central journal article supplement — Cell Death Dis. 2012 Nov 29;3(11):e435–. doi: 10.1038/cddis.2012.174 (PMC3542609; doi:10.1038/cddis.2012.174), 2012-11-29
Supplement: cddis2012174x1.pdf [file cddis2012174x1.pdf]

Day 3

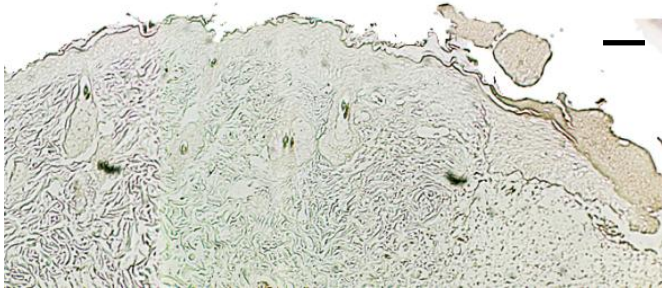

Day 5

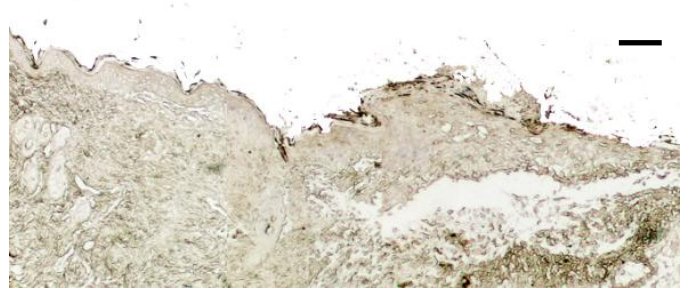

**Fig.S1.** Negative scramble control sequences used as probe for *in situ* hybridizations. Each panel is a composition of six images taken with an 10X objective to provide high resolution over a wide area. Black bar: 100  $\mu$ m.

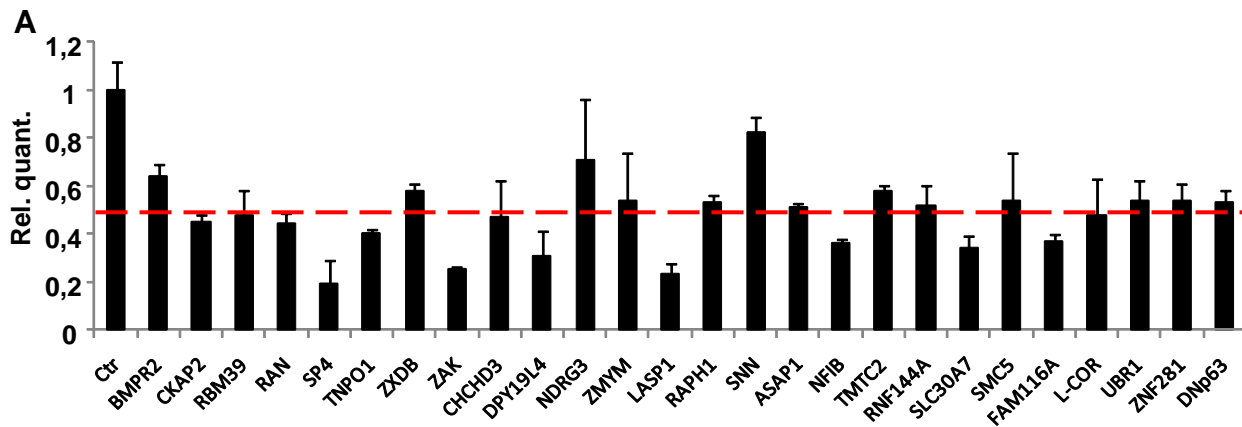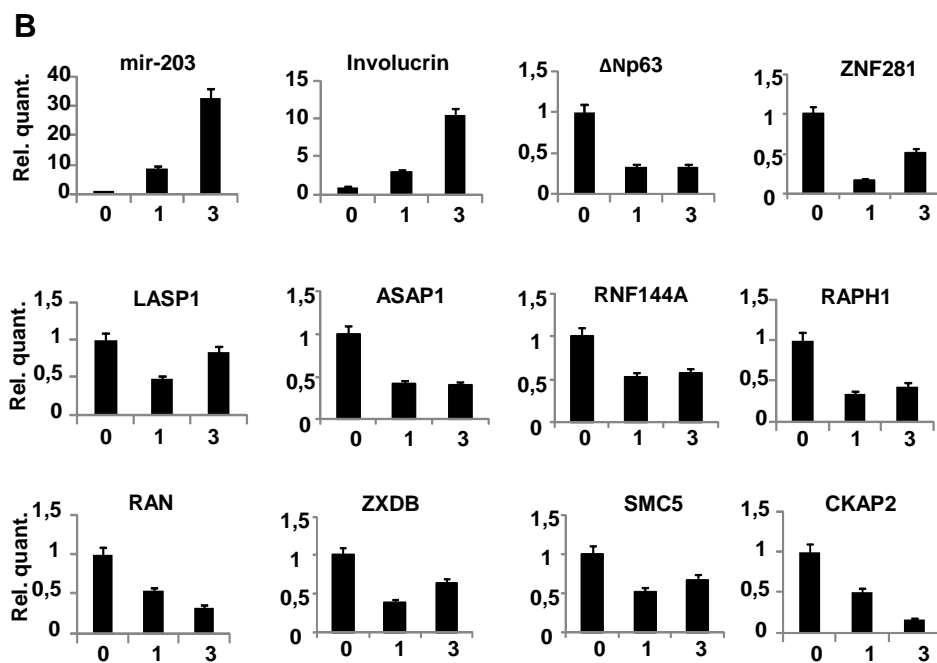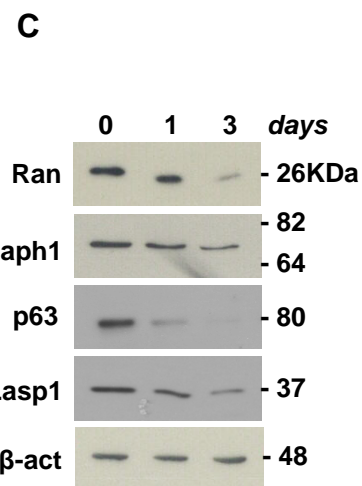

**Fig.S2. Overexpression of miR-203 represses a large number of genes in primary keratinocytes.** (A) Relative quantification by Real Time RT-qPCR of selected mRNAs presenting at least a miR-203 conserved site in their 3'-UTR; HEKns were collected 48h after transfection of premiR-203 or scramble control sequences. (B) Relative quantification by Real Time RT-qPCR of selected mRNAs at days 0, 1, 3 after *in vitro* differentiation induction by 1,2 mM calcium addition in primary mouse keratinocytes culture. (C) Western blot analysis of total protein extracts of *in vitro* differentiated primary mouse keratinocytes. β-actin was used as loading control.

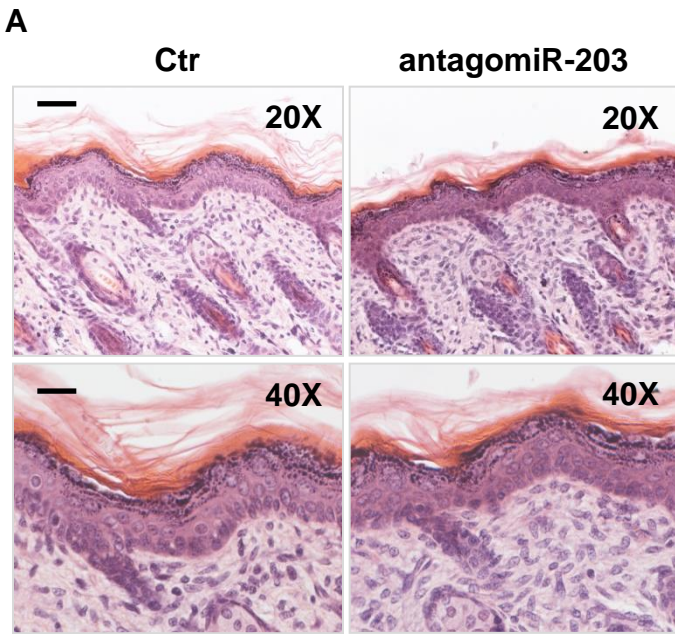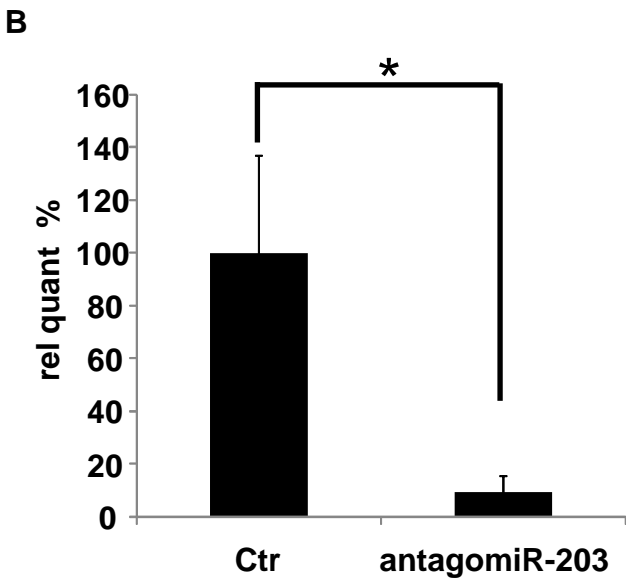

**Fig.S3. *In vivo* effects of miR-203 reduction obtained by subcutaneous injection of an antago-miR sequence.** (A) H&E staining of backskin sections of antagomiR-203 or scramble control sequence of back side subcutaneously injected mice. Black bar: 250  $\mu$ m (20X), 125  $\mu$ m (40X). (B) Relative quantification % of miR-203 expression levels by Real Time RT-qPCR in skin biopses of injected mice. Histogram shows means  $\pm$  SD of miR-203 relative levels in dorsal skin of 4 mice/group. Control group was set at 100% (\* $P < 0,001$ ). For each mouse miR-203 backskin expression was normalized to its own ventral skin expression.

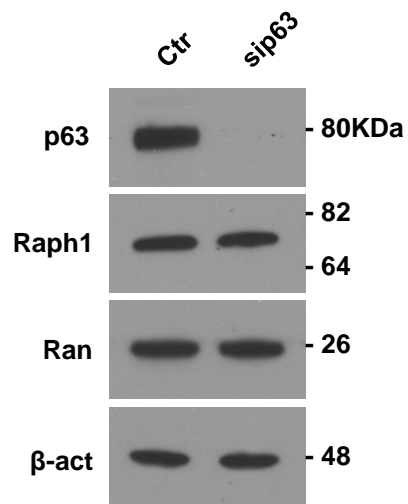

**Fig.S4. p63 silencing by siRNA does not influence Raph1 and Ran expression.** Western blot analysis of Raph1 and Ran protein levels in HEK293 cells 48h post transfection with scramble control or p63 specific siRNA.  $\beta$ -Actin was used as loading control.

| <b>Table S1</b>           | <b>List of primers used for real time RT-qPCR</b> |
|---------------------------|---------------------------------------------------|
| <b><i>Primer name</i></b> | <b><i>Sequence</i></b>                            |
| h-TBP F                   | TCAAACCCAGAATTGTTCTCCTTAT                         |
| h-TBP R                   | CCTGAATCCCTTTAGAATAGGGTAGA                        |
| h-DNp63 F                 | GAAGAAAGGACAGCAGCATTGAT                           |
| h-DNp63 R                 | GGGACTGGTGGACGAGGAG                               |
| h-RAN F                   | GAAGAAGTATGTAGCCACCTTGGG                          |
| h-RAN R                   | AATAGCCATCTCTCAGTCCACCG                           |
| h-CKAP2 F                 | TCAGCCCAAAGAAACCTCGG                              |
| h-CKAP2 R                 | GGTAGTCCAAAAGACCCAACTGG                           |
| h-ZNF281 F                | GAGGACACATAGTGGAGAAAAGCC                          |
| h-ZNF281R                 | TGAGACAACACAGCCAGATTACCC                          |
| h-NFIB F                  | TCCCAAGACTGAGCACTTCC,                             |
| h-NFIB R                  | AAATGGCAACGGTGAAGGAGG                             |
| h-TNPO1 F                 | CTGTGAACCTGTGTATCAGCGTTG                          |
| h-TNPO1 R                 | CAATGTTGCCTCCAAGTCCTC                             |
| h-RBM39 F                 | AAGGAACGGAAGCGAAGTAGAGAC                          |
| h-RBM39 R                 | GATGCTATGAGGCAACCCAATC                            |
| h-BMPR2 F                 | GCTCTTGCCGTCTTGCTCATT                             |
| h-BMPR2 R                 | CACCAGTCTATTTCCAGTCAGCCTC                         |
| h-ZXDB F                  | GAGGTCTCAAGTGTAAGTGTGGGG                          |
| h-ZXDB R                  | CGCTTTGGTTGGTGTGAGTAGTTC                          |
| h-TMTC2 F                 | GCACTCTTTCTTTTCGCTGAACC                           |
| h-TMTC2 R                 | TGTCCAGTATCCATCACCAAGGAG                          |
| h-SLC30A7 F               | TGTTGCCCTGTCCATCAAAG                              |
| h-SLC30A7 R               | CCGTAGAGTAGTTCCACAAAAGCG                          |
| h-ASAP1 F                 | GGAAAGTATGGCAGAGGAGGAAG                           |
| h-ASAP1 R                 | TTGGCAGGTGAGAAGGTTCAAC                            |
| h-RNF144A F               | GATGACAACCATAGCCCAGTGC                            |

|             |                           |
|-------------|---------------------------|
| h-RNF144A R | TCAATCTCGTTCTCCTGTAGGTGG  |
| h-NDRG3 F   | GCTGAAATGCTGCCTCCTGTTC    |
| h-NDRG3 R   | TTCCTGCCCAAAGTGATGAGCC    |
| h-FAM116A F | ACAAGCCTGGGACAACCTCAAATAG |
| h-FAM116 R  | GCCAATACAGTCTCTGATGATTCCG |
| h-DPY19L4 F | GGTGACAGTGCCATTTACTACTCC  |
| h-DPY19L4 R | CGGATACAGAGACATTTGCTGC    |
| h-LASP1 F   | ATCCCACGGAGAAGGTGAACTG    |
| h-LASP1 R   | GCTTGAGGCGAAGGTTTTCC      |
| h-UBR1 F    | CATTAATGGAGGAAGAGAGCACCC  |
| h-UBR1 R    | GGCAGTAGATTTCTGGACACAGGC  |
| h-CHCHD3 F  | GGCGGACGAGAATGAGAACATC    |
| h-CHCHD3 R  | GGCACCATAAGCACCAGAATACC   |
| h-LCOR F    | ATTATCCAGGGAAGCCTCTTGG    |
| h-LCOR R    | GAAAAGGAAGGTCACTGATGTTGC  |
| h-SMC5 F    | TTTCGTGGAAGGCTCTATCGTC    |
| h-SMC5 R    | CAATGGCACACACAATGCTCG     |
| h-ZMYM4 F   | ATGCCCTGAAACTGCCACCTTC    |
| h-ZMYM4 R   | CTGACTTGGAGTGTCTTCTGTCTGG |
| h-RAPH1 F   | GGTGCTGAAGAAGACAGTGACAAGG |
| h-RAPH1 R   | GGAGGAAGCGGTAAGAAAAGTTGGC |
| h-ZAK F     | GGTGGAGGAAGTTTTGGGAGTG    |
| h-ZAK R     | TGCCATAGTTGGGAGGTTCAAG    |
| h-SP4 F     | AGCAGCAGCCTTTACAGAATGTTC  |
| h-SP4 R     | CTTGAAGACACTGGGGTGATGG    |
| h-SNN F     | ATGGACCACAGCCCCACCACGG    |
| h-SNN R     | GGCCGAATACTGCACCAGCAGG    |
| m-actin F   | TGTCCCTGTATGCCTCTGGTCG    |
| m-actin R   | GAACCGCTCGTTGCCAATAGTG    |

|                |                           |
|----------------|---------------------------|
| m-Involucrin F | TCTCCCTCCTGTGAGTTTGTGG    |
| m-involucrin R | CAGTGAAGACCTGGCATTGTGTAGG |
| m-ZNF281 F     | TCCTTGGTGAGCATCAAGCAG     |
| m-ZNF281 R     | GCCTGGTGATCGCTCTTCAG      |
| m-LASP1 F      | ATGCTTTCCTGCGAGACCTGC     |
| m-LASP1 R      | GCTTGAGGCGGAGATTTCC       |
| m-RAN F        | GGCAAAATCTATTGTCTCCACCG   |
| m-RAN R        | AGGTCATCATCTCATCTGGGAG    |
| m-RAPH1 F      | GCCAACTTTTCTTACCGCTTCTC   |
| m-RAPH1 R      | CTATTTCTGAGCCAATGCTGC     |
| m-RNF144A F    | TGTGCCAACTCCAGGACATAGG    |
| m-RNF144A R    | CGCCCTCTTCATCTTGAAAG      |
| m-ZXDB F       | TCGTGTCTCTGTTCTCGGATGTGC  |
| m-ZXDB R       | CCCCAAGGAATGGTTGTGC       |
| m-CKAP2 F      | TTCCCAGTGTCAAAGGCGAG      |
| m-CKAP2 R      | TGCTCACAGGTTTAGCGTCTGC    |
| m-ASAP1 F      | ATCTCCCACGCAACTTCCAAC     |
| m-ASAP1 R      | TCCTGCTCATCTTCTGCTTGAAAG  |
| m-SMC5 F       | CATCCCTGAAAGTAGCCCAGTTC   |
| m-SMC5 R       | TGCCTGTTCTGATCACGCAAGG    |
| m-DNp63 F      | CCTGGAAGCAGAAAAGAGGAGAGC  |
| m-DNp63 R      | TGTGCGTGGTCTGTGTTGTAGG    |

| <b>Table S2</b>           | <b>List of primers used for 3'UTRs cloning</b> |
|---------------------------|------------------------------------------------|
| <b><i>Primer name</i></b> | <b><i>Sequence</i></b>                         |
| RAN 3'UTR F               | GGCCTCTAGAGAATGAAGCTGGAGCCCAGC                 |
| RAN 3'UTR R               | GGCCTCTAGAATTCCCAACCTCCTGCCATCC                |
| RAPH1 3'UTR F             | CCGGTCTAGACTGGATTGCTCCCTCCCTCAGTTC             |
| RAPH1 3'UTR R             | CCGGTCTAGAAAGGATTTGATAAGCTGATATAATG            |
| RAN 3'UTRdel203F          | TAGAATCAGAATAAAGTTGTATATCTAAGCAAGTGAACTC       |
| RAN 3'UTRdel203R          | GAGTTCACCTTGCTTAGATATACAACCTTTATTCTGATTCTA     |
| RAPH1 3'UTRdel203F        | CTTCTGCATAAATGTATGCTTTATGTGCCTTGCTCCCTGA       |
| RAPH1 3'UTR del203R       | TCAGGGAGCAAGGCACATAAAGCATACATTTATGCAGAAG       |
